# Supplementary material for: Accelerating precision anti-cancer therapy by time-lapse and label-free 3D tumor slice culture platform
Source: PubMed Central journal article supplement (PMC8490519; doi:10.7150/thno.59533), 2021-09-13
Supplement: thnov11p9415s7.pdf [file thnov11p9415s7.pdf]

## Supplementary Table 6-8

**Table S6. Antibodies used in this research.**

| Antibodies                            | Brand       | Catalog    | Host species     | Dilution |
|---------------------------------------|-------------|------------|------------------|----------|
| Cleaved Caspase-3 (Asp175) Antibody   | CST         | 9661S      | Rabbit           | 1:100    |
| phospho- $\gamma$ H2AX                | CST         | #2577s     | Rabbit           | 1:100    |
| Anti-Ki67 antibody                    | Abcam       | ab16667    | Rabbit           | 1:200    |
| Desmin                                | Santa Cruz  | sc-23879   | Mouse            | 1:50     |
| anti-Vimentin                         | Abcam       | ab201637   | Rat              | 1:200    |
| Anti-CK7                              | Abcam,      | ab9021     | Mouse            | 1:200    |
| E-cadherin                            | CST         | #3195s     | Rabbit           | 1:100    |
| F4/80 (D2S9R) XP® Rabbit mAb          | CST         | 70076s     | Rabbit           | 1:100    |
| Anti-mouse-CD279 (a-PD-1,29F.1.A12)   | BioLegend   | 135202     | Rat              | 1:100    |
| Anti-mouse-CD274(a-PD-L1,B7-H1)       | BioLegend   | 124302     | Rat              | 1:100    |
| Anti-mouse- CD3e                      | eBioscience | 16-0031-82 | Armenian hamster | 1:200    |
| Anti-mouse- CD8a                      | eBioscience | 42-0081-82 | Rat              | 1:200    |
| CD45 (D3F8Q) Rabbit mAb               | CST         | #70257     | Rabbit           | 1:100    |
| Anti CD3                              | Abcam       | ab5690     | Rabbit           | 1:200    |
| CD4 Monoclonal Antibody (GK1.5)       | eBioscience | 14-0041-82 | Rat              | 1:200    |
| Anti-human PD-L1 antibody             | GeneTex     | GTX104763  | Rabbit           | 1:100    |
| IgG4, Kappa from human myeloma plasma | Sigma       | I4639-1MG  | human            |          |
| Pembrolizumab (anti-human PD-1)       | Selleckchem | A2005-5MG  | human            |          |
| IgG1, Kappa from human myeloma plasma | Sigma       | I5154-1MG  | human            |          |
| Durvalumab (anti-human PD-L1)         | Selleckchem | A2013 -5MG | human            |          |

**Table S7. Kits and Chemicals used in this research.**

| Items                                              | Brand             | Catalog     |
|----------------------------------------------------|-------------------|-------------|
| Recombinant Murine interleukin-2                   | Peprtech          | 212-12      |
| QuantiTect Reverse Transcription Kit (400)         | Qiagen            | 205314      |
| FastStart Universal SYBR Green Master (Rox)        | Roche             | 4913914001  |
| SPLInsert™ Standing, 12 Inserts/24 well plate, PET | SPL Life Sciences | 37524       |
| Cultrex 3-D Culture Matrix™ Rat Collagen I         | Sigma             | 3447-020-01 |

**Table S8. The primers used in this research.**

| <b>Primers for qRT-PCR analysis of human immune genes</b> |     |     |
|-----------------------------------------------------------|-----|-----|
| 18s Forward: TCGTCTTCGAAACTCCGACT                         | BGI | N/A |
| 18s Reverse: CGCGGTTCTATTTTGTTGGT                         | BGI | N/A |
| Gzmb Forward: CCCTGGGAAAACACTCACACA;                      | BGI | N/A |
| Gzmb Reverse: GCACAACTCAATGGTACTGTCG                      | BGI | N/A |
| Prf1 Forward: GACTGCCTGACTGTGAGG;                         | BGI | N/A |
| Prf1 Reverse: TCCCGGTAGGTTTGGTGGAA;                       | BGI | N/A |
| PDCD1 Forward: CCAAGGCGCAGATCAAAGAGA;                     | BGI | N/A |
| PDCD1 Reverse: AGGACCCAGACTAGCAGCA                        | BGI | N/A |
